# Supplementary material
Source: PubMed Central journal article supplement (PMC3122147)
Supplement: NIHMS273638-supplement-Supp_Table_S1.pdf [file NIHMS273638-supplement-Supp_Table_S1.pdf]

Supplementary Table 1

| SNP        | Chr | Position  | Coded allele | Non-coded allele | Coded allele freq | P       | Direction | SNP annotation         | Closest gene | Distance to gene (bp) |
|------------|-----|-----------|--------------|------------------|-------------------|---------|-----------|------------------------|--------------|-----------------------|
| rs3744028  | 17  | 71400267  | c            | t                | 0.18              | 4.0E-09 | +++++++   | INTRONIC               | TRIM65       | 0                     |
| rs9894383  | 17  | 71377252  | g            | t                | 0.19              | 5.3E-09 | +++++++   | DOWNSTREAM             | TRIM47       | 4590                  |
| rs11869977 | 17  | 71368977  | g            | c                | 0.19              | 5.7E-09 | +++++++   | INTERGENIC             | WBP2         | -5881                 |
| rs936393   | 17  | 71359208  | g            | a                | 0.20              | 6.8E-09 | +++++++   | INTRONIC               | WBP2         | 0                     |
| rs3744017  | 17  | 71383062  | a            | g                | 0.19              | 7.3E-09 | +++++++   | INTRONIC               | TRIM47       | 0                     |
| rs1055129  | 17  | 71384543  | g            | a                | 0.30              | 4.1E-08 | +++++++   | INTRONIC               | TRIM47       | 0                     |
| rs11870121 | 17  | 71370533  | g            | a                | 0.21              | 6.8E-08 | +++++++   | INTERGENIC             | WBP2         | -7437                 |
| rs1463485  | 17  | 71363386  | g            | c                | 0.21              | 8.3E-08 | +++++++   | UPSTREAM               | WBP2         | -290                  |
| rs1551619  | 17  | 71397400  | t            | c                | 0.23              | 2.0E-07 | +++++++   | 3PRIME_UTR             | TRIM65       | 0                     |
| rs3785437  | 17  | 71417817  | t            | g                | 0.13              | 2.9E-07 | +++++++   | INTRONIC               | FBF1         | 0                     |
| rs2290771  | 17  | 71356343  | g            | a                | 0.32              | 4.5E-07 | +++++++   | SPLICE_SITE;INTRONIC   | WBP2         | 0                     |
| rs7894407  | 10  | 105166169 | t            | c                | 0.64              | 6.1E-07 | ++-++++   | INTRONIC               | PDCD11       | 0                     |
| rs1892525  | 1   | 68128202  | g            | c                | 0.69              | 7.2E-07 | +++++++   | WITHIN_NON_CODING_GENE | RP11-518D3.1 | 0                     |
| rs3760128  | 17  | 71398483  | g            | a                | 0.33              | 8.0E-07 | +++++++   | NON_SYNONYMOUS_CODING  | TRIM65       | 0                     |
| rs10789247 | 1   | 68133568  | a            | c                | 0.69              | 1.2E-06 | +++++++   | WITHIN_NON_CODING_GENE | RP11-518D3.1 | 0                     |
| rs7521244  | 1   | 68130924  | g            | c                | 0.69              | 1.2E-06 | +++++++   | WITHIN_NON_CODING_GENE | RP11-518D3.1 | 0                     |
| rs10889722 | 1   | 68134016  | g            | a                | 0.69              | 1.2E-06 | +++++++   | WITHIN_NON_CODING_GENE | RP11-518D3.1 | 0                     |
| rs7521135  | 1   | 68130835  | g            | t                | 0.68              | 1.6E-06 | +++++++   | WITHIN_NON_CODING_GENE | RP11-518D3.1 | 0                     |
| rs11590313 | 1   | 68129620  | g            | a                | 0.68              | 1.6E-06 | +++++++   | WITHIN_NON_CODING_GENE | RP11-518D3.1 | 0                     |
| rs7520899  | 1   | 68130765  | c            | t                | 0.68              | 1.7E-06 | +++++++   | WITHIN_NON_CODING_GENE | RP11-518D3.1 | 0                     |
| rs10814323 | 9   | 36021610  | a            | g                | 0.21              | 1.7E-06 | +++++++   | INTERGENIC             | RECK         | -5296                 |
| rs12025677 | 1   | 68132475  | t            | c                | 0.68              | 1.9E-06 | +++++++   | WITHIN_NON_CODING_GENE | RP11-518D3.1 | 0                     |
| rs9895947  | 17  | 71420161  | c            | a                | 0.33              | 2.8E-06 | +++++++   | INTRONIC               | FBF1         | 0                     |
| rs11209171 | 1   | 68129424  | a            | t                | 0.71              | 2.9E-06 | +++++++   | WITHIN_NON_CODING_GENE | RP11-518D3.1 | 0                     |
| rs9302994  | 17  | 71418529  | a            | g                | 0.33              | 3.0E-06 | +++++++   | INTRONIC               | FBF1         | 0                     |
| rs6992136  | 8   | 15786858  | g            | a                | 0.85              | 3.2E-06 | ++-++++   | INTERGENIC             | AC018437.10  | -58150                |
| rs11731436 | 4   | 66437855  | c            | g                | 0.64              | 3.3E-06 | +++++++   | INTERGENIC             | AC097110.1   | -82107                |
| rs12073947 | 1   | 68136078  | a            | c                | 0.69              | 3.8E-06 | +++++++   | WITHIN_NON_CODING_GENE | RP11-518D3.1 | 0                     |
| rs1317272  | 1   | 68136168  | a            | g                | 0.69              | 3.8E-06 | +++++++   | WITHIN_NON_CODING_GENE | RP11-518D3.1 | 0                     |
| rs9325770  | 8   | 15786737  | c            | a                | 0.81              | 3.9E-06 | +++++++   | INTERGENIC             | AC018437.10  | -58271                |
| rs1046446  | 17  | 71407894  | t            | c                | 0.23              | 4.2E-06 | +++++++   | INTRONIC               | MRPL38       | 0                     |

|            |    |           |   |   |      |         |         |                        |               |        |
|------------|----|-----------|---|---|------|---------|---------|------------------------|---------------|--------|
| rs1163238  | 10 | 104933983 | g | a | 0.62 | 4.8E-06 | +++++++ | INTRONIC               | NT5C2         | 0      |
| rs1052053  | 1  | 154468797 | a | g | 0.62 | 5.0E-06 | +++++-- | NON_SYNONYMOUS_CODING  | PMF1;BGLAP    | 0      |
| rs8067076  | 17 | 71348737  | c | a | 0.35 | 5.2E-06 | +++++++ | INTRONIC               | UNC13D        | 0      |
| rs7223416  | 17 | 71347757  | g | c | 0.35 | 5.4E-06 | +++++++ | SYNONYMOUS_CODING      | UNC13D        | 0      |
| rs9650356  | 8  | 15796632  | g | a | 0.82 | 5.4E-06 | +++++++ | INTERGENIC             | AC018437.10   | -48376 |
| rs6996022  | 8  | 15800186  | g | c | 0.82 | 5.5E-06 | +++++++ | INTERGENIC             | AC018437.10   | -44822 |
| rs7221792  | 17 | 71346285  | g | t | 0.35 | 5.5E-06 | +++++++ | INTRONIC               | UNC13D        | 0      |
| rs11598702 | 10 | 104887975 | t | c | 0.62 | 5.6E-06 | +++++++ | INTRONIC               | NT5C2         | 0      |
| rs1135889  | 17 | 71437716  | a | c | 0.23 | 5.6E-06 | +++++++ | NON_SYNONYMOUS_CODING  | FBF1          | 0      |
| rs7217432  | 17 | 71346199  | g | a | 0.35 | 5.8E-06 | +++++++ | INTRONIC               | UNC13D        | 0      |
| rs2167089  | 3  | 29009407  | g | t | 0.73 | 6.0E-06 | +++++++ | INTRONIC               | AC098970.2    | 0      |
| rs10012573 | 4  | 110168035 | a | c | 0.94 | 6.0E-06 | +++++-- | INTRONIC               | COL25A1       | 0      |
| rs17581728 | 17 | 71342591  | t | c | 0.25 | 6.1E-06 | +++++++ | SPLICE_SITE;INTRONIC   | UNC13D        | 0      |
| rs2720623  | 8  | 15777869  | c | g | 0.82 | 6.3E-06 | +++++++ | INTERGENIC             | AC018437.10   | -67139 |
| rs2842873  | 1  | 154471277 | c | t | 0.62 | 6.4E-06 | +++++-- | INTRONIC               | PMF1;BGLAP    | 0      |
| rs17122137 | 8  | 15788164  | g | t | 0.82 | 6.5E-06 | +++++++ | INTERGENIC             | AC018437.10   | -56844 |
| rs7826382  | 8  | 15790582  | a | g | 0.82 | 6.5E-06 | +++++++ | INTERGENIC             | AC018437.10   | -54426 |
| rs9650357  | 8  | 15796646  | t | c | 0.82 | 6.5E-06 | +++++++ | INTERGENIC             | AC018437.10   | -48362 |
| rs1968723  | 8  | 15787737  | t | g | 0.82 | 6.8E-06 | +++++++ | INTERGENIC             | AC018437.10   | -57271 |
| rs2608882  | 17 | 71445725  | a | g | 0.23 | 7.3E-06 | +++++++ | INTRONIC               | FBF1          | 0      |
| rs11625623 | 14 | 51829096  | g | a | 0.23 | 7.7E-06 | +++++++ | INTERGENIC             | PTGDR         | 15905  |
| rs16901064 | 5  | 31422754  | c | a | 0.84 | 7.8E-06 | +++++++ | INTERGENIC             | RNASEN        | 13612  |
| rs6945846  | 7  | 114190152 | c | t | 0.21 | 7.9E-06 | +++++++ | INTERGENIC             | FOXP2         | 71824  |
| rs11191612 | 10 | 104959568 | a | g | 0.63 | 8.1E-06 | +++++++ | INTERGENIC             | RP11-332O19.4 | -5888  |
| rs2290769  | 17 | 71338001  | c | g | 0.25 | 8.1E-06 | +++++++ | INTRONIC               | UNC13D        | 0      |
| rs12189086 | 5  | 31423355  | a | c | 0.84 | 8.2E-06 | +++++++ | INTERGENIC             | RNASEN        | 13011  |
| rs17724534 | 10 | 104595511 | c | t | 0.86 | 8.2E-06 | +++++++ | WITHIN_NON_CODING_GENE | RP11-753C18.7 | 0      |
| rs11629135 | 14 | 63982864  | g | a | 0.93 | 8.6E-06 | +++++++ | INTRONIC               | MTHFD1        | 0      |
| rs2758605  | 1  | 154467069 | g | c | 0.64 | 9.4E-06 | +++++-- | INTRONIC               | PMF1;BGLAP    | 0      |
| rs7714912  | 5  | 31424737  | c | t | 0.85 | 9.6E-06 | +++++++ | INTERGENIC             | RNASEN        | 11629  |
| rs9410016  | 9  | 137360523 | g | c | 0.41 | 9.7E-06 | +++++++ | INTERGENIC             | C9orf62       | -14393 |
| rs2251847  | 1  | 154470671 | g | a | 0.64 | 1.0E-05 | +++++-- | INTRONIC               | PMF1;BGLAP    | 0      |
| rs7039651  | 9  | 36021317  | a | g | 0.11 | 1.0E-05 | +++++++ | INTERGENIC             | RECK          | -5589  |
| rs1390375  | 14 | 51831443  | g | t | 0.24 | 1.0E-05 | +++++++ | INTERGENIC             | PTGDR         | 18252  |

|            |    |           |   |   |      |         |         |                        |               |        |
|------------|----|-----------|---|---|------|---------|---------|------------------------|---------------|--------|
| rs4791242  | 17 | 60488113  | t | c | 0.07 | 1.0E-05 | +++++   | UPSTREAM               | GNA13         | -4731  |
| rs708486   | 14 | 51810721  | g | a | 0.43 | 1.0E-05 | +++++   | INTRONIC               | PTGDR         | 0      |
| rs12339284 | 9  | 36018399  | a | g | 0.12 | 1.0E-05 | +++++   | INTERGENIC             | RP11-113A10.5 | 6289   |
| rs7554886  | 1  | 68117597  | g | c | 0.65 | 1.1E-05 | +++++   | WITHIN_NON_CODING_GENE | RP11-518D3.1  | 0      |
| rs3682     | 17 | 71453745  | g | a | 0.34 | 1.1E-05 | +++++   | 3PRIME_UTR             | ACOX1         | 0      |
| rs12095488 | 1  | 68119220  | g | a | 0.65 | 1.1E-05 | +++++   | WITHIN_NON_CODING_GENE | RP11-518D3.1  | 0      |
| rs12143705 | 1  | 68114955  | t | g | 0.65 | 1.1E-05 | +++++   | WITHIN_NON_CODING_GENE | RP11-518D3.1  | 0      |
| rs1838080  | 17 | 60487242  | a | g | 0.07 | 1.1E-05 | +++++   | UPSTREAM               | GNA13         | -3860  |
| rs12132081 | 1  | 68127236  | c | t | 0.65 | 1.2E-05 | +++++   | WITHIN_NON_CODING_GENE | RP11-518D3.1  | 0      |
| rs9891076  | 17 | 71423310  | t | c | 0.34 | 1.2E-05 | +++++   | INTRONIC               | FBF1          | 0      |
| rs1137582  | 17 | 71461135  | g | c | 0.34 | 1.2E-05 | +++++   | NON_SYNONYMOUS_CODING  | ACOX1         | 0      |
| rs6501843  | 17 | 71461513  | g | a | 0.34 | 1.2E-05 | +++++   | INTRONIC               | ACOX1         | 0      |
| rs11632159 | 15 | 96793511  | g | a | 0.51 | 1.2E-05 | +++++   | DOWNSTREAM             | FAM169B       | 4403   |
| rs8179318  | 1  | 68124590  | a | g | 0.65 | 1.2E-05 | +++++   | WITHIN_NON_CODING_GENE | RP11-518D3.1  | 0      |
| rs7218498  | 17 | 71443442  | g | c | 0.34 | 1.2E-05 | +++++   | INTRONIC               | FBF1          | 0      |
| rs12341524 | 9  | 36016551  | c | t | 0.11 | 1.2E-05 | +++++   | DOWNSTREAM             | RP11-113A10.5 | 4441   |
| rs12345899 | 9  | 36016814  | g | a | 0.11 | 1.2E-05 | +++++   | DOWNSTREAM             | RP11-113A10.5 | 4704   |
| rs10972695 | 9  | 36016455  | g | t | 0.11 | 1.2E-05 | +++++   | DOWNSTREAM             | RP11-113A10.5 | 4345   |
| rs2275563  | 1  | 108679131 | g | t | 0.73 | 1.4E-05 | +++++   | WITHIN_NON_CODING_GENE | NBPF5         | 0      |
| rs6504266  | 17 | 60398801  | g | a | 0.10 | 1.4E-05 | +++++   | WITHIN_NON_CODING_GENE | AC103810.1    | 0      |
| rs729211   | 10 | 105204922 | t | c | 0.67 | 1.4E-05 | ++-++++ | 3PRIME_UTR             | CALHM1        | 0      |
| rs1925888  | 13 | 112294946 | g | a | 0.90 | 1.4E-05 | -+++++  | UPSTREAM               | TUBGCP3       | -4464  |
| rs11103814 | 9  | 137357678 | t | a | 0.39 | 1.4E-05 | +++++   | INTERGENIC             | C9orf62       | -17238 |
| rs11592762 | 10 | 29034382  | t | c | 0.68 | 1.5E-05 | +++++   | INTERGENIC             | BAMBI         | 22508  |
| rs9604369  | 13 | 112298364 | c | t | 0.90 | 1.5E-05 | -+++++  | INTERGENIC             | TUBGCP3       | -7882  |
| rs10853057 | 17 | 60428485  | c | t | 0.08 | 1.5E-05 | +++++   | INTERGENIC             | GNA13         | 7384   |
| rs7327354  | 13 | 112302490 | c | t | 0.90 | 1.6E-05 | -+++++  | INTERGENIC             | TUBGCP3       | -12008 |
| rs11623395 | 14 | 51827625  | a | g | 0.23 | 1.6E-05 | +++++   | INTERGENIC             | PTGDR         | 14434  |
| rs2274299  | 13 | 112305379 | c | t | 0.90 | 1.6E-05 | -+++++  | INTERGENIC             | TUBGCP3       | -14897 |
| rs7337780  | 13 | 112307803 | c | t | 0.90 | 1.6E-05 | -+++++  | INTERGENIC             | TUBGCP3       | -17321 |
| rs2274300  | 13 | 112305436 | c | g | 0.90 | 1.6E-05 | -+++++  | INTERGENIC             | TUBGCP3       | -14954 |
| rs9604371  | 13 | 112305453 | g | t | 0.90 | 1.6E-05 | -+++++  | INTERGENIC             | TUBGCP3       | -14971 |
| rs4970822  | 1  | 108660754 | c | a | 0.73 | 1.6E-05 | +++++   | WITHIN_NON_CODING_GENE | NBPF5         | 0      |
| rs7333030  | 13 | 112302798 | g | c | 0.90 | 1.7E-05 | -+++++  | INTERGENIC             | TUBGCP3       | -12316 |

|            |    |           |   |   |      |         |        |                        |              |        |
|------------|----|-----------|---|---|------|---------|--------|------------------------|--------------|--------|
| rs9989097  | 13 | 112303826 | a | g | 0.90 | 1.7E-05 | ++++++ | INTERGENIC             | TUBGCP3      | -13344 |
| rs7179254  | 15 | 29189678  | t | g | 0.57 | 1.7E-05 | ++++++ | INTERGENIC             | TRPM1        | -8462  |
| rs9989087  | 13 | 112304035 | c | a | 0.90 | 1.7E-05 | ++++++ | INTERGENIC             | TUBGCP3      | -13553 |
| rs12592518 | 15 | 29188611  | t | a | 0.57 | 1.7E-05 | ++++++ | INTERGENIC             | TRPM1        | -7395  |
| rs17390167 | 1  | 3084691   | g | c | 0.07 | 1.7E-05 | ++++++ | INTRONIC               | PRDM16       | 0      |
| rs8025698  | 15 | 29186010  | c | t | 0.57 | 1.7E-05 | ++++++ | UPSTREAM               | TRPM1        | -4794  |
| rs12750165 | 1  | 3085351   | g | a | 0.07 | 1.8E-05 | ++++++ | INTRONIC               | PRDM16       | 0      |
| rs12733843 | 1  | 3086933   | a | g | 0.07 | 1.8E-05 | ++++++ | INTRONIC               | PRDM16       | 0      |
| rs1495790  | 14 | 51826033  | c | t | 0.23 | 1.8E-05 | ++++++ | INTERGENIC             | PTGDR        | 12842  |
| rs9989115  | 13 | 112304065 | t | c | 0.90 | 1.8E-05 | ++++++ | INTERGENIC             | TUBGCP3      | -13583 |
| rs12117427 | 1  | 108665386 | a | g | 0.73 | 1.8E-05 | ++++++ | WITHIN_NON_CODING_GENE | NBPF5        | 0      |
| rs9604370  | 13 | 112305065 | g | t | 0.90 | 1.8E-05 | ++++++ | INTERGENIC             | TUBGCP3      | -14583 |
| rs12772296 | 10 | 29035657  | a | t | 0.68 | 1.8E-05 | ++++++ | INTERGENIC             | BAMBI        | 23783  |
| rs7990359  | 13 | 112304689 | a | g | 0.90 | 1.8E-05 | ++++++ | INTERGENIC             | TUBGCP3      | -14207 |
| rs12461333 | 19 | 40884745  | c | g | 0.80 | 1.9E-05 | +++++  | UPSTREAM               | ZBTB32       | -2524  |
| rs949905   | 1  | 108671681 | t | c | 0.73 | 1.9E-05 | ++++++ | WITHIN_NON_CODING_GENE | NBPF5        | 0      |
| rs10820751 | 9  | 97472021  | a | g | 0.14 | 1.9E-05 | ++++++ | WITHIN_NON_CODING_GENE | RP11-18014.2 | 0      |
| rs11622028 | 14 | 64127298  | g | a | 0.92 | 1.9E-05 | ++++++ | DOWNSTREAM             | C14orf50     | 1449   |
| rs2540173  | 1  | 154454838 | a | g | 0.64 | 1.9E-05 | ++++-  | INTRONIC               | PMF1;BGLAP   | 0      |
| rs12737500 | 1  | 3084568   | t | c | 0.07 | 1.9E-05 | ++++++ | INTRONIC               | PRDM16       | 0      |
| rs11103815 | 9  | 137359678 | t | c | 0.40 | 2.1E-05 | ++++++ | INTERGENIC             | C9orf62      | -15238 |
| rs7669869  | 4  | 66440861  | c | t | 0.68 | 2.2E-05 | ++++++ | INTERGENIC             | AC097110.1   | -85113 |
| rs10115665 | 9  | 137374620 | g | a | 0.42 | 2.2E-05 | ++++++ | UPSTREAM               | C9orf62      | -296   |
| rs1344148  | 1  | 68126909  | g | a | 0.67 | 2.2E-05 | ++++++ | WITHIN_NON_CODING_GENE | RP11-518D3.1 | 0      |
| rs7212449  | 17 | 60403485  | c | t | 0.09 | 2.3E-05 | ++++++ | UPSTREAM               | AC103810.1   | -1329  |
| rs2123456  | 14 | 64126329  | g | a | 0.92 | 2.3E-05 | ++++++ | DOWNSTREAM             | C14orf50     | 480    |
| rs12916281 | 15 | 29190294  | a | g | 0.58 | 2.3E-05 | ++++++ | INTERGENIC             | TRPM1        | -9078  |
| rs723594   | 14 | 64124611  | t | c | 0.92 | 2.4E-05 | ++++++ | SYNONYMOUS_CODING      | C14orf50     | 0      |
| rs17824827 | 14 | 64102031  | g | a | 0.88 | 2.4E-05 | ++++++ | INTRONIC               | C14orf50     | 0      |
| rs2720602  | 8  | 15801982  | g | c | 0.78 | 2.5E-05 | ++++++ | INTERGENIC             | AC018437.10  | -43026 |
| rs2296569  | 10 | 104826501 | a | g | 0.81 | 2.5E-05 | +++++  | INTRONIC               | CNNM2        | 0      |
| rs1421750  | 5  | 127240127 | a | c | 0.68 | 2.6E-05 | ++++++ | INTRONIC               | AC068658.4   | 0      |
| rs12095487 | 1  | 68119219  | g | a | 0.66 | 2.6E-05 | ++++++ | WITHIN_NON_CODING_GENE | RP11-518D3.1 | 0      |
| rs11623381 | 14 | 64128423  | g | t | 0.91 | 2.6E-05 | ++++-  | DOWNSTREAM             | C14orf50     | 2574   |

|            |    |           |   |   |      |         |        |                   |                   |         |
|------------|----|-----------|---|---|------|---------|--------|-------------------|-------------------|---------|
| rs11709854 | 3  | 243981    | g | c | 0.84 | 2.6E-05 | ++++++ | INTRONIC          | CHL1              | 0       |
| rs2236222  | 14 | 63984935  | a | g | 0.92 | 2.6E-05 | ++++++ | INTRONIC          | MTHFD1            | 0       |
| rs10034460 | 4  | 14492145  | a | t | 0.10 | 2.6E-05 | +----- | INTERGENIC        | CPEB2             | -122475 |
| rs2123457  | 14 | 64128872  | a | t | 0.91 | 2.6E-05 | ++++++ | DOWNSTREAM        | C14orf50          | 3023    |
| rs2764766  | 5  | 127241524 | g | c | 0.68 | 2.7E-05 | ++++++ | INTRONIC          | AC068658.4        | 0       |
| rs4146566  | 5  | 56137651  | g | c | 0.06 | 2.7E-05 | +----- | INTERGENIC        | MAP3K1            | -9006   |
| rs9907451  | 17 | 16745331  | c | t | 0.91 | 2.7E-05 | ++++++ | INTERGENIC        | TBC1D27;TNFRSF13B | 21623   |
| rs2544780  | 5  | 127242062 | c | t | 0.68 | 2.7E-05 | ++++++ | INTRONIC          | AC068658.4        | 0       |
| rs7697829  | 4  | 66433236  | g | t | 0.65 | 2.8E-05 | ++++++ | INTERGENIC        | AC097110.1        | -77488  |
| rs654269   | 18 | 40698239  | a | g | 0.35 | 2.8E-05 | ++++++ | INTRONIC          | SETBP1            | 0       |
| rs1368709  | 4  | 66453707  | c | g | 0.65 | 2.8E-05 | ++++++ | INTERGENIC        | AC097110.1        | -97959  |
| rs16876489 | 8  | 30090832  | t | c | 0.08 | 2.8E-05 | ++++++ | INTRONIC          | LEPROTL1          | 0       |
| rs7669544  | 4  | 66440716  | c | g | 0.65 | 2.8E-05 | ++++++ | INTERGENIC        | AC097110.1        | -84968  |
| rs1433634  | 4  | 66440061  | g | a | 0.65 | 2.8E-05 | ++++++ | INTERGENIC        | AC097110.1        | -84313  |
| rs2396751  | 7  | 113902285 | g | a | 0.46 | 2.9E-05 | ++++++ | INTRONIC          | FOXP2             | 0       |
| rs2189011  | 7  | 113902504 | c | t | 0.46 | 2.9E-05 | ++++++ | INTRONIC          | FOXP2             | 0       |
| rs11733158 | 4  | 66441151  | a | c | 0.65 | 2.9E-05 | ++++++ | INTERGENIC        | AC097110.1        | -85403  |
| rs1433635  | 4  | 66439872  | c | t | 0.65 | 2.9E-05 | ++++++ | INTERGENIC        | AC097110.1        | -84124  |
| rs8012229  | 14 | 63981315  | t | c | 0.92 | 2.9E-05 | ++++++ | INTRONIC          | MTHFD1            | 0       |
| rs2077841  | 14 | 33381468  | a | g | 0.82 | 2.9E-05 | ++++++ | INTERGENIC        | NPAS3             | 38335   |
| rs665997   | 18 | 40681595  | c | t | 0.34 | 3.0E-05 | ++++++ | INTRONIC          | SETBP1            | 0       |
| rs9649368  | 7  | 113930887 | a | t | 0.46 | 3.0E-05 | ++++++ | INTRONIC          | FOXP2             | 0       |
| rs11557703 | 8  | 30081493  | t | c | 0.08 | 3.0E-05 | ++++++ | SYNONYMOUS_CODING | LEPROTL1          | 0       |
| rs575802   | 10 | 111634198 | a | g | 0.54 | 3.1E-05 | ++++++ | INTRONIC          | XPNPEP1           | 0       |
| rs1433641  | 4  | 66455633  | c | t | 0.66 | 3.1E-05 | ++++++ | INTERGENIC        | AC097110.1        | -99885  |
| rs9899666  | 17 | 16744196  | g | a | 0.91 | 3.1E-05 | ++++++ | INTERGENIC        | TBC1D27;TNFRSF13B | 22758   |
| rs16876487 | 8  | 30088963  | a | g | 0.08 | 3.1E-05 | ++++++ | INTRONIC          | LEPROTL1          | 0       |
| rs122730   | 5  | 127248170 | t | c | 0.68 | 3.1E-05 | ++++++ | INTRONIC          | AC068658.4        | 0       |
| rs12965289 | 18 | 40677160  | t | g | 0.34 | 3.1E-05 | ++++++ | INTRONIC          | SETBP1            | 0       |
| rs17095485 | 14 | 27570619  | c | t | 0.94 | 3.1E-05 | ++++++ | INTERGENIC        | AL445384.3        | 41454   |
| rs11851064 | 14 | 27567900  | c | a | 0.94 | 3.2E-05 | ++++++ | INTERGENIC        | AL445384.3        | 38736   |
| rs12113612 | 7  | 113926920 | a | g | 0.46 | 3.2E-05 | ++++++ | INTRONIC          | FOXP2             | 0       |
| rs1952840  | 14 | 27568624  | a | g | 0.94 | 3.2E-05 | ++++++ | INTERGENIC        | AL445384.3        | 39460   |
| rs10279936 | 7  | 113934453 | a | c | 0.46 | 3.2E-05 | ++++++ | INTRONIC          | FOXP2             | 0       |

|            |    |           |   |   |      |         |         |                        |              |        |
|------------|----|-----------|---|---|------|---------|---------|------------------------|--------------|--------|
| rs7032559  | 9  | 137342239 | t | c | 0.39 | 3.2E-05 | +++++++ | INTERGENIC             | C9orf62      | -32677 |
| rs17113464 | 14 | 27571151  | g | a | 0.94 | 3.2E-05 | +++++++ | INTERGENIC             | AL445384.3   | 41986  |
| rs12200142 | 6  | 132359858 | c | g | 0.10 | 3.2E-05 | +++++++ | WITHIN_NON_CODING_GENE | RP11-69I8.3  | 0      |
| rs245173   | 5  | 127252052 | g | c | 0.68 | 3.2E-05 | +++++++ | INTRONIC               | AC068658.4   | 0      |
| rs17113467 | 14 | 27571204  | c | a | 0.94 | 3.2E-05 | +++++++ | INTERGENIC             | AL445384.3   | 42039  |
| rs151855   | 5  | 127250007 | a | c | 0.68 | 3.2E-05 | +++++++ | INTRONIC               | AC068658.4   | 0      |
| rs2106900  | 7  | 113909742 | t | c | 0.46 | 3.2E-05 | +++++++ | INTRONIC               | FOXP2        | 0      |
| rs17113470 | 14 | 27575946  | t | c | 0.94 | 3.2E-05 | +++++++ | INTERGENIC             | AL445384.3   | 46778  |
| rs4791246  | 17 | 60424458  | c | t | 0.08 | 3.3E-05 | +++++++ | INTERGENIC             | GNA13        | 11411  |
| rs17113473 | 14 | 27577979  | a | g | 0.94 | 3.3E-05 | +++++++ | INTERGENIC             | AL445384.3   | 48811  |
| rs2189008  | 7  | 113910544 | t | c | 0.46 | 3.3E-05 | +++++++ | INTRONIC               | FOXP2        | 0      |
| rs122734   | 5  | 127252221 | c | t | 0.68 | 3.3E-05 | +++++++ | INTRONIC               | AC068658.4   | 0      |
| rs7370     | 17 | 71406399  | a | g | 0.27 | 3.3E-05 | +++++++ | 3PRIME_UTR             | MRPL38       | 0      |
| rs2027035  | 6  | 132361444 | t | c | 0.10 | 3.3E-05 | +++++++ | WITHIN_NON_CODING_GENE | RP11-69I8.3  | 0      |
| rs6551966  | 4  | 66432897  | c | g | 0.65 | 3.4E-05 | +++++++ | INTERGENIC             | AC097110.1   | -77149 |
| rs151853   | 5  | 127255083 | a | g | 0.68 | 3.4E-05 | +++++++ | INTRONIC               | AC068658.4   | 0      |
| rs7683949  | 4  | 66428616  | a | c | 0.65 | 3.4E-05 | +++++++ | INTERGENIC             | AC097110.1   | -72868 |
| rs1888386  | 14 | 27578480  | c | a | 0.94 | 3.4E-05 | +++++++ | INTERGENIC             | AL445384.3   | 49312  |
| rs13136864 | 4  | 66428461  | c | t | 0.65 | 3.4E-05 | +++++++ | INTERGENIC             | AC097110.1   | -72713 |
| rs1511167  | 8  | 30100258  | a | g | 0.08 | 3.5E-05 | +++++++ | INTRONIC               | LEPROTL1     | 0      |
| rs1888387  | 14 | 27578499  | c | t | 0.94 | 3.5E-05 | +++++++ | INTERGENIC             | AL445384.3   | 49331  |
| rs826809   | 7  | 146698652 | c | t | 0.57 | 3.5E-05 | +++++++ | INTRONIC               | AC073273.9   | 7390   |
| rs7898695  | 10 | 3174507   | g | a | 0.55 | 3.5E-05 | +++++++ | INTRONIC               | RP11-298E9.3 | 0      |
| rs861160   | 7  | 146695279 | a | c | 0.57 | 3.5E-05 | +++++++ | INTRONIC               | AC073273.9   | 10763  |
| rs3818239  | 14 | 63984290  | t | c | 0.89 | 3.7E-05 | +++++++ | INTRONIC               | MTHFD1       | 0      |
| rs6815830  | 4  | 14516033  | c | t | 0.09 | 3.9E-05 | +++++++ | INTERGENIC             | CPEB2        | -98587 |
| rs245167   | 5  | 127257094 | c | t | 0.68 | 3.9E-05 | +++++++ | INTRONIC               | AC068658.4   | 0      |
| rs10841289 | 12 | 19674988  | g | t | 0.51 | 4.0E-05 | +++++++ | INTERGENIC             | AC090059.9   | -93648 |
| rs16876445 | 8  | 30077206  | a | g | 0.08 | 4.0E-05 | +++++++ | INTRONIC               | LEPROTL1     | 0      |
| rs11620680 | 14 | 64086862  | t | a | 0.92 | 4.0E-05 | +++++++ | INTRONIC               | C14orf50     | 0      |
| rs1566741  | 8  | 30197971  | g | a | 0.05 | 4.0E-05 | +++++++ | INTERGENIC             | DCTN6        | 37370  |
| rs4843558  | 16 | 85782974  | a | g | 0.62 | 4.1E-05 | +++++++ | INTERGENIC             | AC010531.8-1 | 110950 |
| rs10443386 | 1  | 18317101  | c | a | 0.71 | 4.1E-05 | +++++++ | INTRONIC               | IGSF21       | 0      |
| rs4843559  | 16 | 85782932  | a | g | 0.62 | 4.2E-05 | +++++++ | INTERGENIC             | AC010531.8-1 | 110992 |

|            |    |           |   |   |      |         |        |            |               |         |
|------------|----|-----------|---|---|------|---------|--------|------------|---------------|---------|
| rs1015587  | 5  | 9885022   | g | a | 0.16 | 4.3E-05 | ++++++ | INTERGENIC | AC091838.2    | 70906   |
| rs6987718  | 8  | 30200442  | t | c | 0.05 | 4.3E-05 | ++++++ | INTERGENIC | DCTN6         | 39841   |
| rs7946234  | 11 | 126097079 | g | c | 0.95 | 4.3E-05 | ++++++ | INTERGENIC | KIRREL3       | -159057 |
| rs193495   | 5  | 127262843 | c | t | 0.68 | 4.4E-05 | ++++++ | INTRONIC   | AC068658.4    | 0       |
| rs12569910 | 10 | 29035569  | a | g | 0.61 | 4.4E-05 | ++++++ | INTERGENIC | BAMBI         | 23695   |
| rs3112215  | 2  | 38891317  | a | g | 0.28 | 4.5E-05 | ++++++ | INTRONIC   | AC018693.7    | 0       |
| rs12953318 | 17 | 60420702  | g | a | 0.10 | 4.5E-05 | ++++++ | INTERGENIC | GNA13         | 15167   |
| rs9910274  | 17 | 60421219  | g | a | 0.10 | 4.5E-05 | ++++++ | INTERGENIC | GNA13         | 14650   |
| rs6551971  | 4  | 66436936  | a | c | 0.66 | 4.5E-05 | ++++++ | INTERGENIC | AC097110.1    | -81188  |
| rs6493462  | 15 | 29192146  | t | c | 0.59 | 4.5E-05 | ++++++ | INTERGENIC | TRPM1         | -10930  |
| rs868444   | 8  | 49665034  | c | a | 0.83 | 4.6E-05 | ++++++ | UPSTREAM   | AC026904.1    | -480    |
| rs12711472 | 16 | 85781633  | c | a | 0.62 | 4.6E-05 | ++++++ | INTERGENIC | AC010531.8-1  | 112291  |
| rs4962462  | 10 | 127165266 | g | a | 0.45 | 4.6E-05 | ++++++ | INTERGENIC | RP11-359B3.1  | -12775  |
| rs4962461  | 10 | 127165192 | a | g | 0.44 | 4.6E-05 | ++++++ | INTERGENIC | RP11-359B3.1  | -12701  |
| rs245221   | 5  | 127267299 | t | a | 0.70 | 4.6E-05 | ++++++ | INTRONIC   | AC068658.4    | 0       |
| rs16937921 | 8  | 49654428  | t | c | 0.83 | 4.6E-05 | ++++++ | INTERGENIC | AC026904.1    | -11086  |
| rs16886445 | 5  | 56201785  | g | a | 0.06 | 4.7E-05 | ++++++ | INTRONIC   | MAP3K1        | 0       |
| rs2409033  | 5  | 127262473 | c | t | 0.68 | 4.7E-05 | ++++++ | INTRONIC   | AC068658.4    | 0       |
| rs245158   | 5  | 127275499 | t | a | 0.69 | 4.7E-05 | ++++++ | INTRONIC   | AC068658.4    | 0       |
| rs1562855  | 2  | 38861972  | c | t | 0.28 | 4.7E-05 | ++++++ | INTRONIC   | GEMIN6        | 0       |
| rs12735521 | 1  | 18322908  | c | t | 0.66 | 4.7E-05 | ++++++ | INTRONIC   | IGSF21        | 0       |
| rs7501452  | 17 | 60432014  | t | c | 0.10 | 4.9E-05 | ++++++ | DOWNSTREAM | GNA13         | 3855    |
| rs4861352  | 4  | 40690636  | c | t | 0.90 | 4.9E-05 | ++++++ | INTRONIC   | APBB2         | 0       |
| rs2044178  | 17 | 60416299  | a | g | 0.10 | 4.9E-05 | ++++++ | INTERGENIC | AC103810.1    | -14143  |
| rs4861076  | 4  | 40684175  | t | c | 0.90 | 4.9E-05 | ++++++ | INTRONIC   | APBB2         | 0       |
| rs11070816 | 15 | 29193627  | t | a | 0.59 | 4.9E-05 | ++++++ | INTERGENIC | TRPM1         | -12411  |
| rs2879275  | 15 | 29196382  | c | t | 0.59 | 4.9E-05 | ++++++ | INTERGENIC | TRPM1         | -15166  |
| rs10938478 | 4  | 40683805  | t | c | 0.90 | 5.0E-05 | ++++++ | INTRONIC   | APBB2         | 0       |
| rs12938589 | 17 | 60416824  | c | a | 0.10 | 5.0E-05 | ++++++ | INTERGENIC | AC103810.1    | -14668  |
| rs2048175  | 4  | 40682379  | c | t | 0.90 | 5.0E-05 | ++++++ | INTRONIC   | APBB2         | 0       |
| rs17736358 | 10 | 105216528 | t | c | 0.80 | 5.2E-05 | ++++++ | DOWNSTREAM | RP11-225H22.4 | 4086    |
| rs1276300  | 1  | 68031406  | g | a | 0.26 | 5.2E-05 | ++++++ | INTRONIC   | GNG12         | 0       |
| rs10901384 | 10 | 127163632 | a | g | 0.45 | 5.2E-05 | ++++++ | INTERGENIC | RP11-359B3.1  | -11141  |
| rs10793999 | 10 | 127164074 | g | c | 0.45 | 5.2E-05 | ++++++ | INTERGENIC | RP11-359B3.1  | -11583  |

|            |    |           |   |   |      |         |         |            |               |         |
|------------|----|-----------|---|---|------|---------|---------|------------|---------------|---------|
| rs2241108  | 1  | 154447631 | c | g | 0.65 | 5.2E-05 | +++++-- | 3PRIME_UTR | SLC25A44      | 0       |
| rs7068573  | 10 | 127162806 | g | t | 0.44 | 5.3E-05 | +++++++ | INTERGENIC | RP11-359B3.1  | -10315  |
| rs16876504 | 8  | 30094860  | g | a | 0.08 | 5.3E-05 | +++++++ | INTRONIC   | LEPROTL1      | 0       |
| rs10077075 | 5  | 56092481  | t | c | 0.05 | 5.3E-05 | +++++++ | INTERGENIC | AC008940.1    | -9902   |
| rs12939956 | 17 | 60432844  | c | t | 0.10 | 5.3E-05 | +++++++ | DOWNSTREAM | GNA13         | 3025    |
| rs2853641  | 1  | 154448394 | a | g | 0.65 | 5.3E-05 | +++++-- | 3PRIME_UTR | SLC25A44      | 0       |
| rs12705982 | 7  | 114123350 | t | c | 0.44 | 5.3E-05 | +++++++ | INTERGENIC | FOXP2         | 5022    |
| rs1276301  | 1  | 68031990  | t | c | 0.26 | 5.4E-05 | +++++++ | INTRONIC   | GNG12         | 0       |
| rs7929968  | 11 | 126100134 | g | a | 0.95 | 5.4E-05 | +++++++ | INTERGENIC | KIRREL3       | -162112 |
| rs2241107  | 1  | 154449334 | t | c | 0.65 | 5.4E-05 | +++++-- | UPSTREAM   | PMF1;BGLAP    | -74     |
| rs4239089  | 17 | 60432444  | t | c | 0.10 | 5.4E-05 | +++++++ | DOWNSTREAM | GNA13         | 3425    |
| rs6856268  | 4  | 40681586  | c | t | 0.90 | 5.5E-05 | +++++++ | INTRONIC   | APBB2         | 0       |
| rs10467997 | 15 | 29198135  | g | a | 0.58 | 5.5E-05 | +++++++ | INTERGENIC | TRPM1         | -16919  |
| rs17685439 | 17 | 60411795  | c | a | 0.10 | 5.6E-05 | +++++++ | INTERGENIC | AC103810.1    | -9639   |
| rs10794002 | 10 | 127167956 | t | c | 0.45 | 5.6E-05 | +++++++ | INTERGENIC | RP11-359B3.1  | -15465  |
| rs10794003 | 10 | 127168477 | c | t | 0.45 | 5.7E-05 | +++++++ | INTERGENIC | RP11-359B3.1  | -15986  |
| rs9465867  | 6  | 10406081  | c | t | 0.66 | 5.7E-05 | +++++-- | INTERGENIC | RP1-290I10.2  | 67762   |
| rs4791250  | 17 | 60413607  | t | g | 0.10 | 5.7E-05 | +++++++ | INTERGENIC | AC103810.1    | -11451  |
| rs11244517 | 10 | 127166881 | a | t | 0.45 | 5.7E-05 | +++++++ | INTERGENIC | RP11-359B3.1  | -14390  |
| rs7089422  | 10 | 104595318 | c | t | 0.81 | 5.7E-05 | +++++++ | UPSTREAM   | RP11-753C18.7 | -24     |
| rs4861357  | 4  | 40704209  | t | c | 0.89 | 5.7E-05 | +++++++ | INTRONIC   | APBB2         | 0       |
| rs10901385 | 10 | 127168305 | t | c | 0.45 | 5.7E-05 | +++++++ | INTERGENIC | RP11-359B3.1  | -15814  |
| rs6705330  | 2  | 203370442 | a | g | 0.88 | 5.7E-05 | +++++-- | INTRONIC   | ICA1L         | 0       |
| rs7897631  | 10 | 127166951 | a | g | 0.45 | 5.7E-05 | +++++++ | INTERGENIC | RP11-359B3.1  | -14460  |
| rs1123189  | 8  | 49520992  | c | t | 0.85 | 5.8E-05 | +++++++ | INTERGENIC | AC041040.1    | 60687   |
| rs12944877 | 17 | 60465716  | g | a | 0.09 | 5.8E-05 | +++++++ | INTRONIC   | GNA13         | 0       |
| rs17113460 | 14 | 27567045  | a | g | 0.94 | 5.9E-05 | +++++-- | INTERGENIC | AL445384.3    | 37881   |
| rs12511584 | 4  | 40672691  | t | c | 0.89 | 5.9E-05 | +++++++ | INTRONIC   | APBB2         | 0       |
| rs11209156 | 1  | 68045995  | c | t | 0.73 | 5.9E-05 | +++++++ | INTRONIC   | GNG12         | 0       |
| rs12705979 | 7  | 114121807 | t | c | 0.44 | 5.9E-05 | +++++++ | DOWNSTREAM | FOXP2         | 3479    |
| rs622759   | 18 | 40683089  | c | g | 0.29 | 5.9E-05 | +-----  | INTRONIC   | SETBP1        | 0       |
| rs12705980 | 7  | 114122079 | a | g | 0.44 | 6.0E-05 | +++++++ | DOWNSTREAM | FOXP2         | 3751    |
| rs1276305  | 1  | 68034857  | t | c | 0.27 | 6.0E-05 | +++++++ | INTRONIC   | GNG12         | 0       |
| rs12705978 | 7  | 114121718 | a | g | 0.44 | 6.0E-05 | +++++-- | DOWNSTREAM | FOXP2         | 3390    |



|            |    |           |   |   |      |         |        |                        |               |        |
|------------|----|-----------|---|---|------|---------|--------|------------------------|---------------|--------|
| rs12064317 | 1  | 213293664 | g | t | 0.86 | 6.1E-05 | ++++++ | INTRONIC               | KCNK2         | 0      |
| rs2253677  | 1  | 154437920 | c | g | 0.66 | 6.2E-05 | +++++- | INTRONIC               | SLC25A44      | 0      |
| rs17162992 | 7  | 141669716 | t | a | 0.41 | 6.2E-05 | ++++++ | UPSTREAM               | AC231381.2-12 | 1868   |
| rs6665177  | 1  | 213298091 | g | a | 0.84 | 6.2E-05 | ++++++ | INTRONIC               | KCNK2         | 0      |
| rs3812429  | 8  | 71264273  | t | c | 0.86 | 6.2E-05 | -++++- | INTRONIC               | NCOA2         | 0      |
| rs623980   | 10 | 111636137 | g | a | 0.60 | 6.2E-05 | ++++++ | INTRONIC               | XPNPEP1       | 0      |
| rs2011307  | 17 | 60470459  | c | t | 0.09 | 6.2E-05 | ++++++ | INTRONIC               | GNA13         | 0      |
| rs1393550  | 8  | 49615550  | g | t | 0.83 | 6.2E-05 | ++++++ | INTERGENIC             | AC026904.1    | -49964 |
| rs1276304  | 1  | 68033489  | g | c | 0.26 | 6.2E-05 | ++++++ | INTRONIC               | GNG12         | 0      |
| rs1276303  | 1  | 68033366  | c | t | 0.27 | 6.3E-05 | ++++++ | INTRONIC               | GNG12         | 0      |
| rs10972691 | 9  | 36012197  | c | g | 0.13 | 6.3E-05 | ++++++ | DOWNSTREAM             | RP11-113A10.5 | 87     |
| rs12705981 | 7  | 114122193 | c | a | 0.44 | 6.3E-05 | ++++++ | DOWNSTREAM             | FOXP2         | 3865   |
| rs2842857  | 1  | 154435360 | t | c | 0.66 | 6.3E-05 | +++++- | INTRONIC               | SLC25A44      | 0      |
| rs11244514 | 10 | 127161384 | c | a | 0.44 | 6.3E-05 | ++++++ | INTERGENIC             | RP11-359B3.1  | -8893  |
| rs936146   | 7  | 114081641 | c | g | 0.45 | 6.4E-05 | ++++++ | INTRONIC               | FOXP2         | 0      |
| rs12207504 | 6  | 132393559 | a | g | 0.10 | 6.4E-05 | ++++++ | WITHIN_NON_CODING_GENE | RP11-69I8.3   | 0      |
| rs10250103 | 7  | 114082178 | t | c | 0.45 | 6.4E-05 | ++++++ | INTRONIC               | FOXP2         | 0      |
| rs10511925 | 9  | 36011852  | g | a | 0.13 | 6.4E-05 | ++++++ | WITHIN_NON_CODING_GENE | RP11-113A10.5 | 0      |
| rs12705970 | 7  | 114094386 | g | c | 0.44 | 6.4E-05 | ++++++ | 3PRIME_UTR             | FOXP2         | 0      |
| rs970214   | 8  | 49609951  | a | g | 0.83 | 6.4E-05 | ++++++ | INTERGENIC             | AC026904.1    | -55563 |
| rs7023581  | 9  | 36012613  | g | a | 0.13 | 6.4E-05 | ++++++ | DOWNSTREAM             | RP11-113A10.5 | 503    |
| rs12206258 | 6  | 1654702   | c | t | 0.33 | 6.4E-05 | ++++++ | INTRONIC               | GMDS          | 0      |
| rs10087665 | 8  | 49649791  | a | c | 0.83 | 6.5E-05 | ++++++ | INTERGENIC             | AC026904.1    | -15723 |
| rs7027417  | 9  | 36013246  | g | a | 0.13 | 6.5E-05 | ++++++ | DOWNSTREAM             | RP11-113A10.5 | 1136   |
| rs11244519 | 10 | 127172257 | t | c | 0.45 | 6.5E-05 | ++++++ | INTERGENIC             | RP11-359B3.1  | -19766 |
| rs10793998 | 10 | 127156494 | a | g | 0.44 | 6.5E-05 | ++++++ | UPSTREAM               | RP11-359B3.1  | -4003  |
| rs1276311  | 1  | 68037515  | a | g | 0.26 | 6.6E-05 | ++++++ | INTRONIC               | GNG12         | 0      |
| rs12154391 | 7  | 114087953 | c | t | 0.45 | 6.6E-05 | ++++++ | INTRONIC               | FOXP2         | 0      |
| rs6551968  | 4  | 66433172  | g | a | 0.65 | 6.6E-05 | ++++++ | INTERGENIC             | AC097110.1    | -77424 |
| rs1433636  | 4  | 66439836  | t | a | 0.65 | 6.6E-05 | ++++++ | INTERGENIC             | AC097110.1    | -84088 |
| rs1005958  | 7  | 114090091 | g | a | 0.45 | 6.6E-05 | ++++++ | INTRONIC               | FOXP2         | 0      |
| rs7029349  | 9  | 36008417  | a | g | 0.13 | 6.7E-05 | ++++++ | UPSTREAM               | RP11-113A10.5 | -3272  |
| rs12705971 | 7  | 114097289 | t | g | 0.44 | 6.7E-05 | ++++++ | INTRONIC               | FOXP2         | 0      |
| rs12705984 | 7  | 114124851 | a | g | 0.42 | 6.7E-05 | +++++- | INTERGENIC             | FOXP2         | 6523   |

|            |    |           |   |   |      |         |         |                   |               |         |
|------------|----|-----------|---|---|------|---------|---------|-------------------|---------------|---------|
| rs2891639  | 8  | 49604088  | g | a | 0.83 | 6.7E-05 | +++++++ | INTERGENIC        | AC026904.1    | -61426  |
| rs11707773 | 3  | 237775    | a | t | 0.81 | 6.7E-05 | +++++++ | INTRONIC          | CHL1          | 0       |
| rs342142   | 12 | 61441405  | a | c | 0.76 | 6.7E-05 | ++-+++  | INTRONIC          | PPM1H         | 0       |
| rs696574   | 2  | 187936761 | t | c | 0.15 | 6.7E-05 | +-++++  | INTRONIC          | CALCRL        | 0       |
| rs17832466 | 10 | 29015528  | c | t | 0.69 | 6.7E-05 | +++++++ | DOWNSTREAM        | BAMBI         | 3654    |
| rs2882385  | 4  | 66415021  | a | c | 0.65 | 6.7E-05 | +++++++ | INTERGENIC        | AC097110.1    | -59273  |
| rs12352029 | 9  | 36010393  | a | t | 0.13 | 6.7E-05 | +++++++ | UPSTREAM          | RP11-113A10.5 | -1296   |
| rs13120978 | 4  | 66439177  | c | t | 0.65 | 6.8E-05 | +++++++ | INTERGENIC        | AC097110.1    | -83429  |
| rs7029221  | 9  | 36008310  | t | g | 0.13 | 6.8E-05 | +++++++ | UPSTREAM          | RP11-113A10.5 | -3379   |
| rs6504271  | 17 | 60476199  | c | t | 0.09 | 6.8E-05 | +++++++ | INTRONIC          | GNA13         | 0       |
| rs6427304  | 1  | 154423413 | a | g | 0.64 | 6.8E-05 | +++++-- | INTERGENIC        | SLC25A44      | -6941   |
| rs2492874  | 1  | 68056080  | c | a | 0.26 | 6.8E-05 | +++++++ | INTRONIC          | GNG12         | 0       |
| rs3771095  | 2  | 187919357 | t | c | 0.10 | 6.8E-05 | +++++++ | SYNONYMOUS_CODING | CALCRL        | 0       |
| rs10109021 | 8  | 2516152   | a | c | 0.83 | 6.8E-05 | -+++++  | INTERGENIC        | CSMD1         | 264130  |
| rs7029143  | 9  | 36008404  | t | c | 0.13 | 6.9E-05 | +++++++ | UPSTREAM          | RP11-113A10.5 | -3285   |
| rs588160   | 10 | 111631528 | t | c | 0.60 | 6.9E-05 | +++++++ | INTRONIC          | XPNPEP1       | 0       |
| rs1276309  | 1  | 68035491  | a | g | 0.26 | 6.9E-05 | +++++++ | INTRONIC          | GNG12         | 0       |
| rs10098707 | 8  | 49586813  | t | g | 0.82 | 6.9E-05 | +++++++ | INTERGENIC        | AC026904.1    | -78701  |
| rs4356239  | 11 | 126101940 | a | t | 0.95 | 7.0E-05 | +++++++ | INTERGENIC        | KIRREL3       | -163918 |
| rs2077559  | 9  | 36004850  | g | a | 0.13 | 7.0E-05 | +++++++ | DOWNSTREAM        | RP11-113A10.3 | 720     |
| rs1708700  | 18 | 32303072  | g | c | 0.43 | 7.1E-05 | +++++++ | INTRONIC          | FHOD3         | 0       |
| rs10901382 | 10 | 127155969 | g | a | 0.44 | 7.1E-05 | +++++++ | UPSTREAM          | RP11-359B3.1  | -3478   |
| rs13120542 | 4  | 66438942  | c | t | 0.65 | 7.1E-05 | +++++++ | INTERGENIC        | AC097110.1    | -83194  |
| rs1108048  | 16 | 85803232  | a | g | 0.55 | 7.1E-05 | ++++++  | INTERGENIC        | AC010531.8-1  | 90692   |
| rs2475277  | 10 | 111629720 | t | c | 0.60 | 7.2E-05 | +++++++ | INTRONIC          | XPNPEP1       | 0       |
| rs2274341  | 10 | 104843493 | a | t | 0.76 | 7.2E-05 | +++++++ | INTRONIC          | NT5C2         | 0       |
| rs9308344  | 16 | 85782431  | g | c | 0.66 | 7.2E-05 | ++++++  | INTERGENIC        | AC010531.8-1  | 111493  |
| rs8076716  | 17 | 60478471  | c | t | 0.09 | 7.3E-05 | +++++++ | INTRONIC          | GNA13         | 0       |
| rs1916885  | 7  | 121323416 | a | g | 0.81 | 7.3E-05 | +++++++ | INTRONIC          | PTPRZ1        | 0       |
| rs17616633 | 16 | 50009184  | c | t | 0.57 | 7.4E-05 | +++++-  | INTERGENIC        | AC084058.6-1  | -228046 |
| rs6816565  | 4  | 66452097  | c | g | 0.56 | 7.4E-05 | +++++++ | INTERGENIC        | AC097110.1    | -96349  |
| rs10094801 | 8  | 49623145  | g | a | 0.83 | 7.4E-05 | +++++++ | INTERGENIC        | AC026904.1    | -42369  |
| rs16937767 | 8  | 49620085  | c | t | 0.83 | 7.4E-05 | +++++++ | INTERGENIC        | AC026904.1    | -45429  |
| rs9641678  | 7  | 121325240 | a | g | 0.81 | 7.4E-05 | +++++++ | INTRONIC          | PTPRZ1        | 0       |

|            |    |           |   |   |      |         |         |                        |               |         |
|------------|----|-----------|---|---|------|---------|---------|------------------------|---------------|---------|
| rs12054623 | 4  | 66434848  | g | c | 0.65 | 7.5E-05 | +++++++ | INTERGENIC             | AC097110.1    | -79100  |
| rs10972689 | 9  | 36006167  | g | a | 0.13 | 7.5E-05 | +++++++ | DOWNSTREAM             | RP11-113A10.3 | 2037    |
| rs5001149  | 8  | 49625507  | g | t | 0.83 | 7.5E-05 | +++++++ | INTERGENIC             | AC026904.1    | -40007  |
| rs17264828 | 3  | 252219    | t | c | 0.82 | 7.5E-05 | +++++++ | INTRONIC               | CHL1          | 0       |
| rs678726   | 18 | 40694227  | t | c | 0.33 | 7.6E-05 | +++++++ | INTRONIC               | SETBP1        | 0       |
| rs4842252  | 9  | 137361232 | a | g | 0.38 | 7.6E-05 | +++++++ | INTERGENIC             | C9orf62       | -13684  |
| rs6971645  | 7  | 121329317 | c | g | 0.82 | 7.6E-05 | +++++++ | INTRONIC               | PTPRZ1        | 0       |
| rs13143389 | 4  | 40680773  | t | c | 0.89 | 7.6E-05 | +++++++ | INTRONIC               | APBB2         | 0       |
| rs6981394  | 8  | 49628530  | a | g | 0.83 | 7.6E-05 | +++++++ | INTERGENIC             | AC026904.1    | -36984  |
| rs4314728  | 9  | 35999389  | c | t | 0.13 | 7.6E-05 | +++++++ | UPSTREAM               | RP11-113A10.3 | -3792   |
| rs10883855 | 10 | 105082437 | c | t | 0.65 | 7.7E-05 | +++++++ | INTRONIC               | PCGF6         | 0       |
| rs12066755 | 1  | 213298065 | a | t | 0.85 | 7.7E-05 | +++++++ | INTRONIC               | KCNK2         | 0       |
| rs12669706 | 7  | 121332379 | g | a | 0.82 | 7.7E-05 | +++++++ | INTRONIC               | PTPRZ1        | 0       |
| rs2396765  | 7  | 114092205 | c | t | 0.45 | 7.7E-05 | +++++++ | 3PRIME_UTR             | FOXP2         | 0       |
| rs11120483 | 1  | 213313917 | a | g | 0.86 | 7.7E-05 | +++++++ | INTRONIC               | KCNK2         | 0       |
| rs1111711  | 9  | 36005653  | a | g | 0.13 | 7.8E-05 | +++++++ | DOWNSTREAM             | RP11-113A10.3 | 1523    |
| rs12088480 | 1  | 213313459 | c | t | 0.86 | 7.8E-05 | +++++++ | INTRONIC               | KCNK2         | 0       |
| rs1378772  | 7  | 114091866 | t | a | 0.45 | 7.8E-05 | +++++++ | 3PRIME_UTR             | FOXP2         | 0       |
| rs877309   | 1  | 11412265  | a | g | 0.51 | 7.8E-05 | +++++++ | UPSTREAM               | RP11-149P14.1 | -3787   |
| rs10028068 | 4  | 66479717  | g | c | 0.56 | 7.8E-05 | +++++++ | INTERGENIC             | AC097110.1    | -123969 |
| rs10817162 | 9  | 113010910 | g | a | 0.51 | 7.9E-05 | +++++++ | WITHIN_NON_CODING_GENE | RP11-202G18.1 | 0       |
| rs3123602  | 1  | 11411762  | g | a | 0.51 | 7.9E-05 | +++++++ | UPSTREAM               | RP11-149P14.1 | -3284   |
| rs1378771  | 7  | 114091799 | t | c | 0.45 | 7.9E-05 | +++++++ | 3PRIME_UTR             | FOXP2         | 0       |
| rs10249531 | 7  | 113801810 | c | t | 0.37 | 7.9E-05 | +++++++ | INTRONIC               | FOXP2         | 0       |
| rs17101927 | 14 | 33375649  | g | t | 0.82 | 7.9E-05 | +++++++ | INTERGENIC             | NPAS3         | 32516   |
| rs1280054  | 6  | 76597708  | a | g | 0.48 | 8.0E-05 | +++++++ | INTRONIC               | MYO6          | 0       |
| rs278145   | 12 | 118596482 | t | c | 0.31 | 8.1E-05 | +++++++ | INTRONIC               | PRKAB1        | 0       |
| rs6885944  | 5  | 116437571 | g | c | 0.33 | 8.2E-05 | +++++++ | INTERGENIC             | RPS17P2       | 357286  |
| rs1563408  | 7  | 114090425 | a | g | 0.45 | 8.2E-05 | +++++++ | INTRONIC               | FOXP2         | 0       |
| rs2569146  | 5  | 127124700 | c | a | 0.66 | 8.2E-05 | +++++++ | INTRONIC               | AC068658.4    | 0       |
| rs2244144  | 1  | 154451222 | g | a | 0.66 | 8.2E-05 | +++++++ | INTRONIC               | PMF1;BGLAP    | 0       |
| rs887953   | 1  | 154457773 | t | c | 0.66 | 8.2E-05 | +++++++ | INTRONIC               | PMF1;BGLAP    | 0       |
| rs10157622 | 1  | 68110081  | g | a | 0.69 | 8.3E-05 | +++++++ | WITHIN_NON_CODING_GENE | RP11-518D3.1  | 0       |
| rs4730637  | 7  | 114091069 | a | g | 0.45 | 8.4E-05 | +++++++ | INTRONIC               | FOXP2         | 0       |

|            |    |           |   |   |      |         |        |                            |                      |         |
|------------|----|-----------|---|---|------|---------|--------|----------------------------|----------------------|---------|
| rs2958759  | 8  | 30247097  | a | c | 0.05 | 8.5E-05 | ++++++ | INTERGENIC                 | DCTN6                | 86496   |
| rs1515640  | 5  | 127125262 | a | g | 0.66 | 8.5E-05 | ++++++ | INTRONIC                   | AC068658.4           | 0       |
| rs2154376  | 1  | 68100164  | t | c | 0.70 | 8.5E-05 | ++++++ | WITHIN_NON_CODING_GENE     | RP11-518D3.1         | 0       |
| rs1433639  | 4  | 66456228  | t | c | 0.56 | 8.5E-05 | ++++++ | INTERGENIC                 | AC097110.1           | -100480 |
| rs6957330  | 7  | 113951401 | g | a | 0.22 | 8.5E-05 | ++++++ | INTRONIC                   | FOXP2                | 0       |
| rs17372211 | 7  | 113916228 | a | g | 0.25 | 8.5E-05 | ++++++ | INTRONIC                   | FOXP2                | 0       |
| rs1363374  | 5  | 165120354 | c | t | 0.61 | 8.5E-05 | ++++++ | INTERGENIC                 | N/A                  | -9      |
| rs724427   | 1  | 182206608 | a | t | 0.90 | 8.6E-05 | ++++++ | INTRONIC                   | GLT25D2              | 0       |
| rs1938446  | 1  | 68108212  | g | a | 0.69 | 8.7E-05 | ++++++ | WITHIN_NON_CODING_GENE     | RP11-518D3.1         | 0       |
| rs12257568 | 10 | 105512865 | t | c | 0.40 | 8.7E-05 | ++++++ | INTRONIC                   | SH3PXD2A             | 0       |
| rs245156   | 5  | 127273042 | a | g | 0.68 | 8.7E-05 | ++++++ | INTRONIC                   | AC068658.4           | 0       |
| rs6934008  | 6  | 150647875 | g | t | 0.74 | 8.7E-05 | ++++++ | INTERGENIC                 | AL357561.19-1        | -24074  |
| rs10186864 | 2  | 76836402  | c | t | 0.25 | 8.8E-05 | ++++++ | INTRONIC                   | LRRTM4               | 0       |
| rs12921347 | 16 | 85784344  | g | c | 0.66 | 8.8E-05 | ++++++ | INTERGENIC                 | AC010531.8-1         | 109580  |
| rs840617   | 2  | 187938578 | a | t | 0.15 | 8.8E-05 | ++++++ | INTRONIC                   | CALCRL               | 0       |
| rs3134628  | 2  | 38831116  | a | g | 0.28 | 8.8E-05 | ++++++ | INTRONIC                   | SFRS7                | 0       |
| rs272226   | 6  | 72431818  | a | g | 0.90 | 8.8E-05 | ++++++ | INTERGENIC                 | AL132794.25          | -12783  |
| rs12621103 | 2  | 38832268  | t | c | 0.28 | 8.8E-05 | ++++++ | 5PRIME_UTR                 | GEMIN6               | 0       |
| rs6719001  | 2  | 203486148 | g | a | 0.88 | 8.8E-05 | ++++++ | REGULATORY_REGION;INTRONIC | ALS2CR8              | 0       |
| rs7093667  | 10 | 105070565 | c | t | 0.65 | 8.9E-05 | ++++++ | INTRONIC                   | PCGF6                | 0       |
| rs11635657 | 15 | 29185374  | t | c | 0.36 | 8.9E-05 | ++++++ | UPSTREAM                   | TRPM1                | -4158   |
| rs6946211  | 7  | 121342027 | c | t | 0.85 | 9.0E-05 | ++++++ | INTRONIC                   | PTPRZ1               | 0       |
| rs12705985 | 7  | 114125211 | a | g | 0.39 | 9.0E-05 | ++++++ | INTERGENIC                 | FOXP2                | 6883    |
| rs2629703  | 4  | 86564311  | a | g | 0.65 | 9.0E-05 | ++++++ | INTERGENIC                 | ARHGAP24             | -50980  |
| rs4463116  | 4  | 66456805  | t | c | 0.56 | 9.0E-05 | ++++++ | INTERGENIC                 | AC097110.1           | -101057 |
| rs6793612  | 3  | 23659316  | c | t | 0.32 | 9.1E-05 | ++++++ | UPSTREAM                   | AC116992.2           | -1229   |
| rs6829200  | 4  | 40674804  | t | c | 0.89 | 9.1E-05 | ++++++ | INTRONIC                   | APBB2                | 0       |
| rs386560   | 10 | 4623815   | t | c | 0.26 | 9.2E-05 | ++++++ | INTERGENIC                 | RP11-117P22.1        | 59194   |
| rs755577   | 10 | 105214056 | g | a | 0.69 | 9.2E-05 | ++++++ | DOWNSTREAM                 | RP11-225H22.4        | 1614    |
| rs10991564 | 9  | 97474126  | t | c | 0.14 | 9.2E-05 | ++++++ | WITHIN_NON_CODING_GENE     | RP11-180I4.2         | 0       |
| rs9400317  | 6  | 110114340 | a | g | 0.13 | 9.3E-05 | ++++++ | INTRONIC                   | C6orf224;C6orf199;AI | 0       |
| rs11656396 | 17 | 60476538  | t | c | 0.09 | 9.4E-05 | ++++++ | INTRONIC                   | GNA13                | 0       |
| rs2938206  | 8  | 30247001  | g | c | 0.05 | 9.4E-05 | ++++++ | INTERGENIC                 | DCTN6                | 86400   |
| rs10991595 | 9  | 97474849  | g | c | 0.14 | 9.4E-05 | ++++++ | WITHIN_NON_CODING_GENE     | RP11-180I4.2         | 0       |

|            |    |           |   |   |      |         |        |                                   |               |       |
|------------|----|-----------|---|---|------|---------|--------|-----------------------------------|---------------|-------|
| rs3762515  | 2  | 56004368  | t | c | 0.10 | 9.5E-05 | ++++++ | REGULATORY_REGION;5PRIME_UTEREMP1 |               | 0     |
| rs17422091 | 2  | 38767746  | c | g | 0.30 | 9.6E-05 | ++++++ | INTRONIC                          | GALM          | 0     |
| rs12203614 | 6  | 1658389   | c | t | 0.12 | 9.6E-05 | ++++++ | INTRONIC                          | GMDS          | 0     |
| rs6661145  | 1  | 11408253  | c | t | 0.51 | 9.6E-05 | ++++++ | WITHIN_NON_CODING_GENE            | RP11-149P14.1 | 0     |
| rs9581708  | 13 | 26054057  | g | a | 0.14 | 9.7E-05 | ++++++ | INTRONIC                          | WASF3         | 0     |
| rs2223089  | 10 | 124200150 | c | g | 0.10 | 9.7E-05 | ++++++ | UPSTREAM                          | ARMS2         | -4019 |
| rs13222712 | 7  | 114135798 | a | c | 0.39 | 9.8E-05 | ++++++ | INTERGENIC                        | FOXP2         | 17470 |
| rs13246064 | 7  | 114134729 | a | g | 0.39 | 9.8E-05 | ++++++ | INTERGENIC                        | FOXP2         | 16401 |
| rs1109787  | 18 | 32302106  | g | t | 0.44 | 9.8E-05 | ++++++ | INTRONIC                          | FHOD3         | 0     |
| rs17372022 | 7  | 113907171 | g | t | 0.25 | 9.9E-05 | ++++++ | INTRONIC                          | FOXP2         | 0     |
| rs1864271  | 2  | 227488510 | c | g | 0.30 | 9.9E-05 | ++++++ | INTRONIC                          | RHBDD1        | 0     |
