# Supplementary material
Source: PubMed Central journal article supplement (PMC3122147)

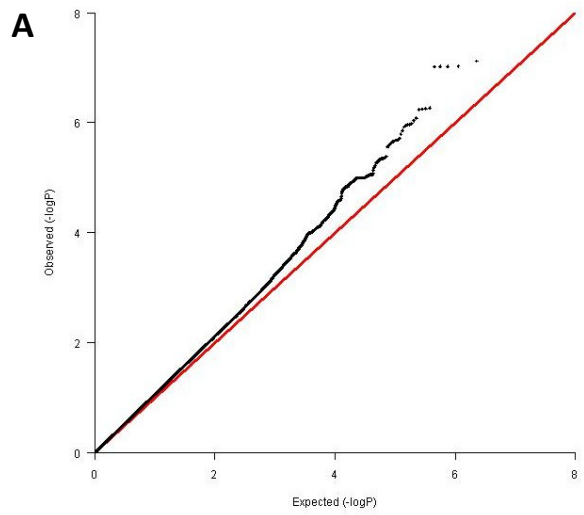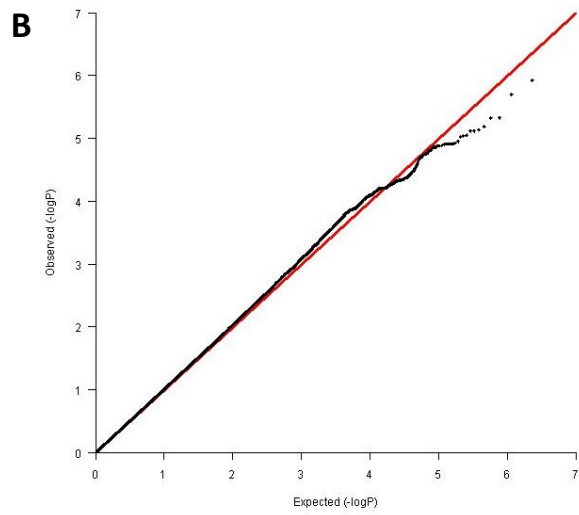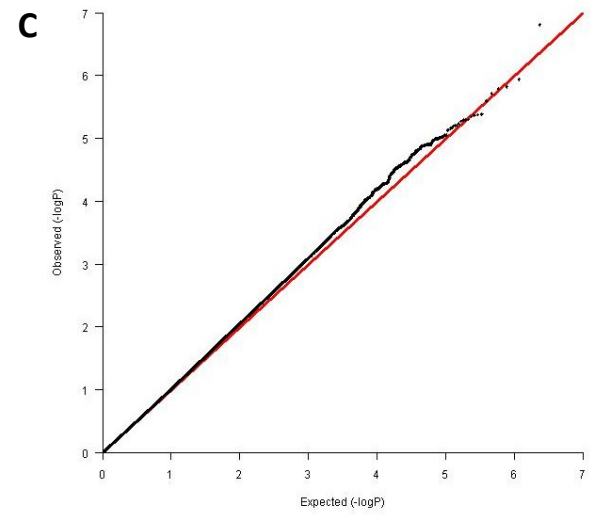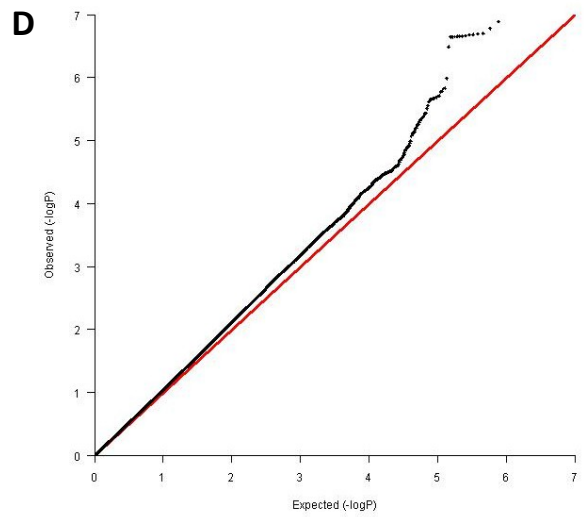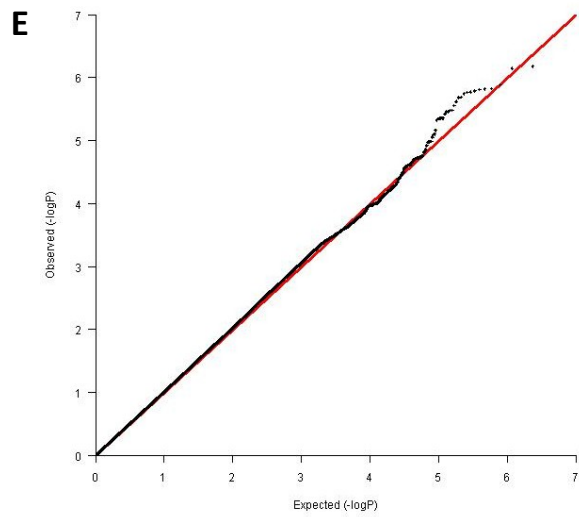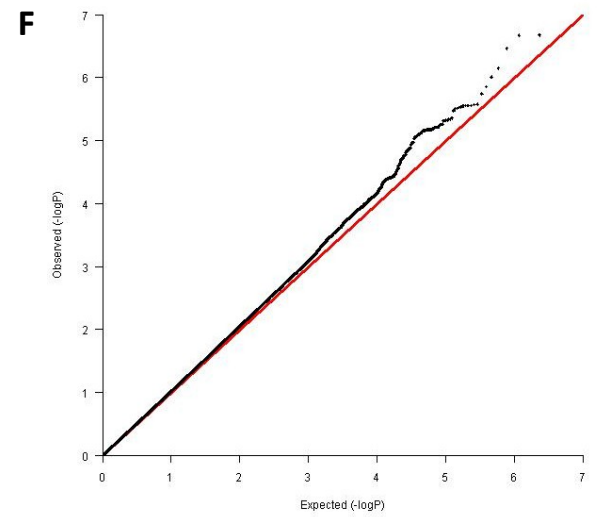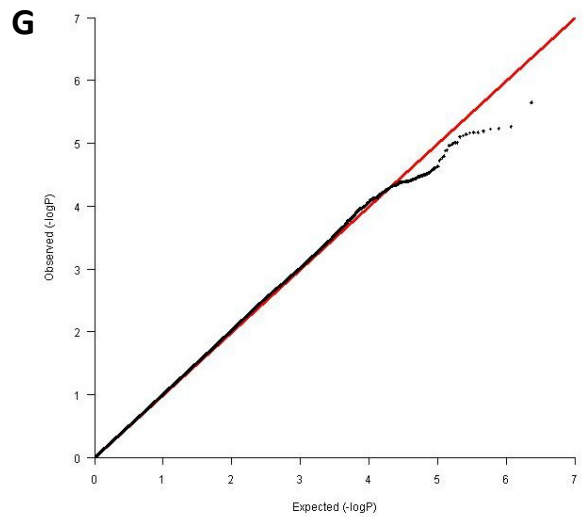

Supplement: NIHMS273638-supplement-Supp_Fig_S1.pdf [file NIHMS273638-supplement-Supp_Fig_S1.pdf]

2a

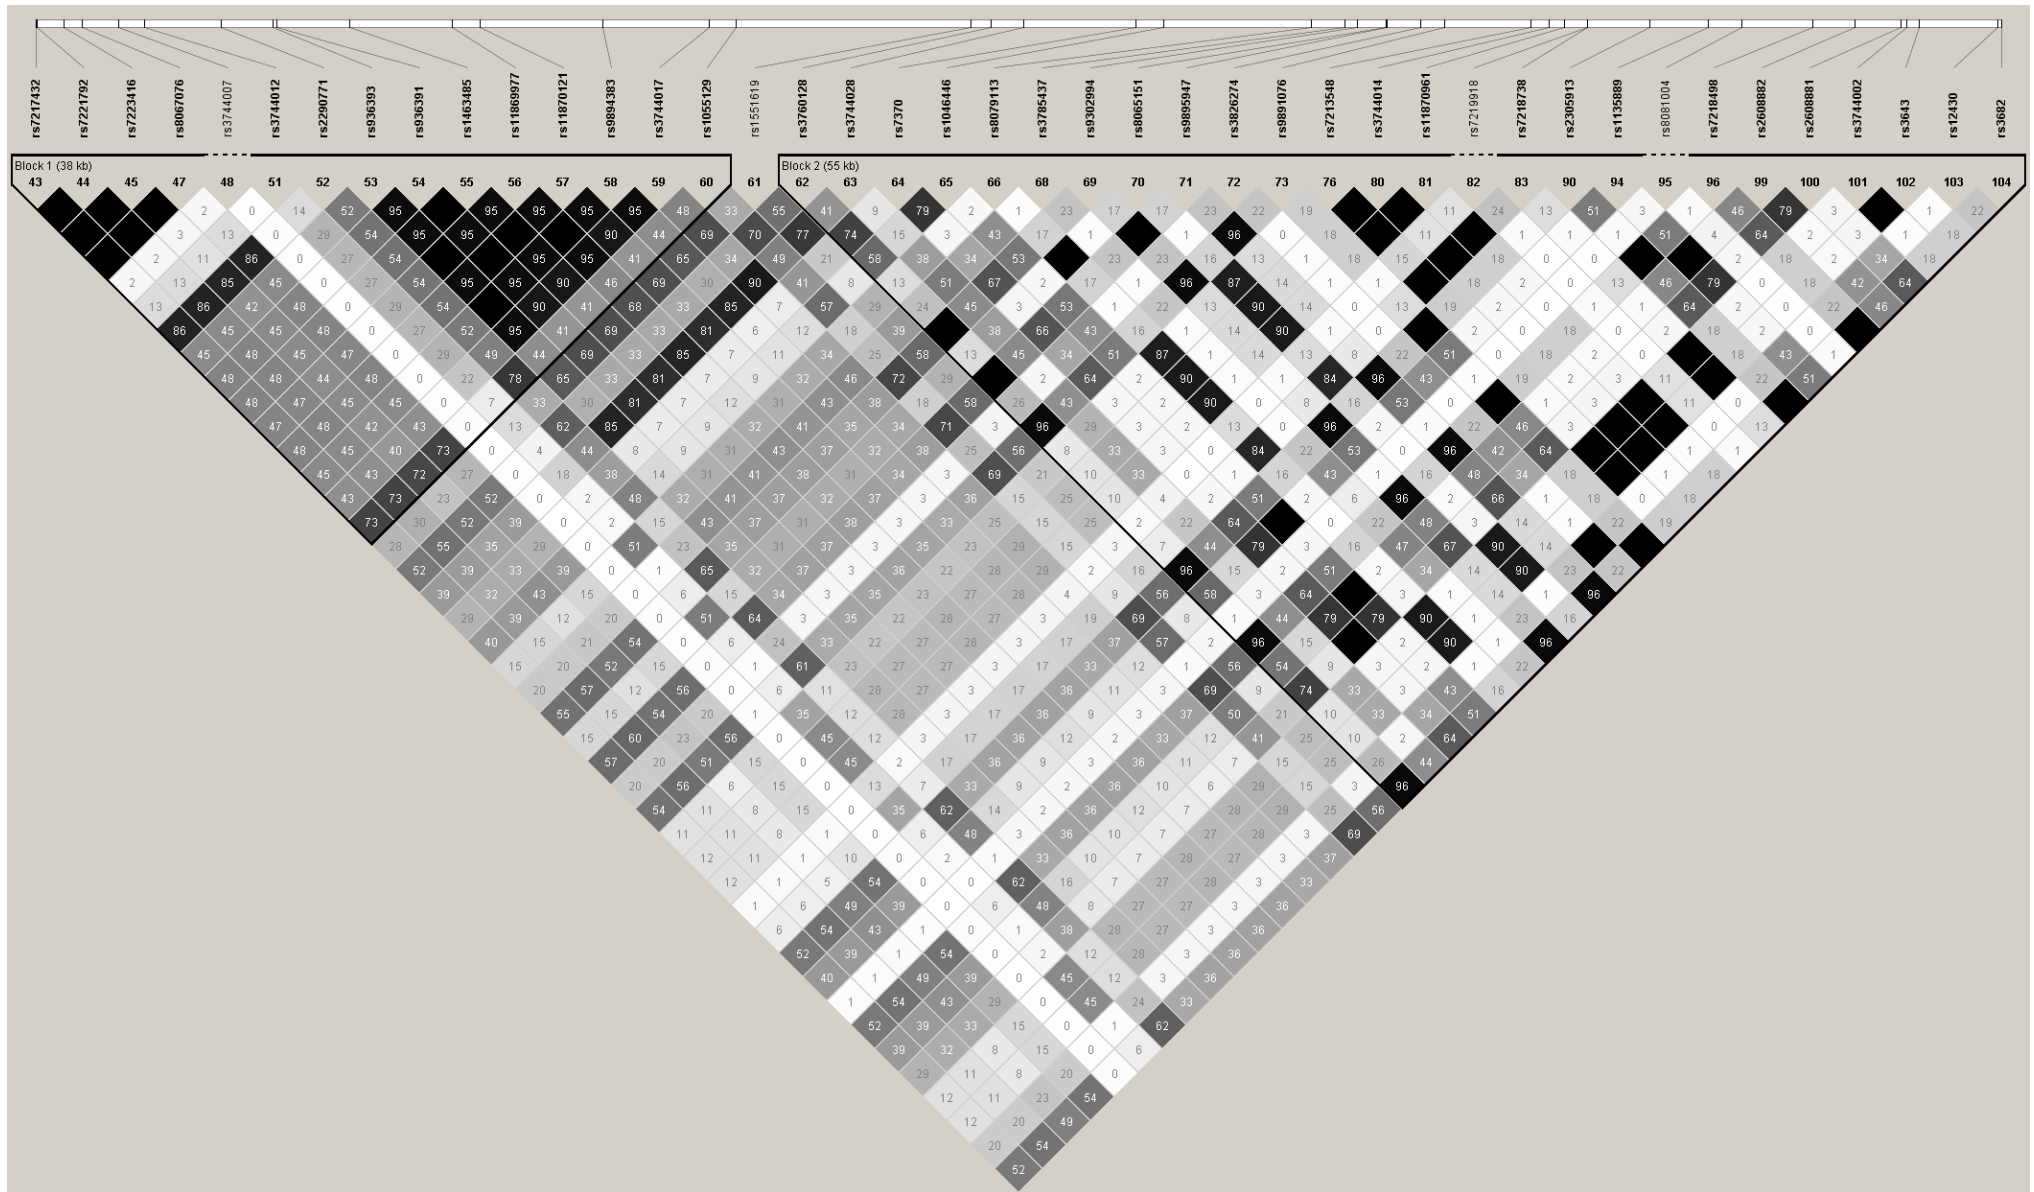

Supplement: NIHMS273638-supplement-Supp_Fig_S2.pdf [file NIHMS273638-supplement-Supp_Fig_S2.pdf]

2b

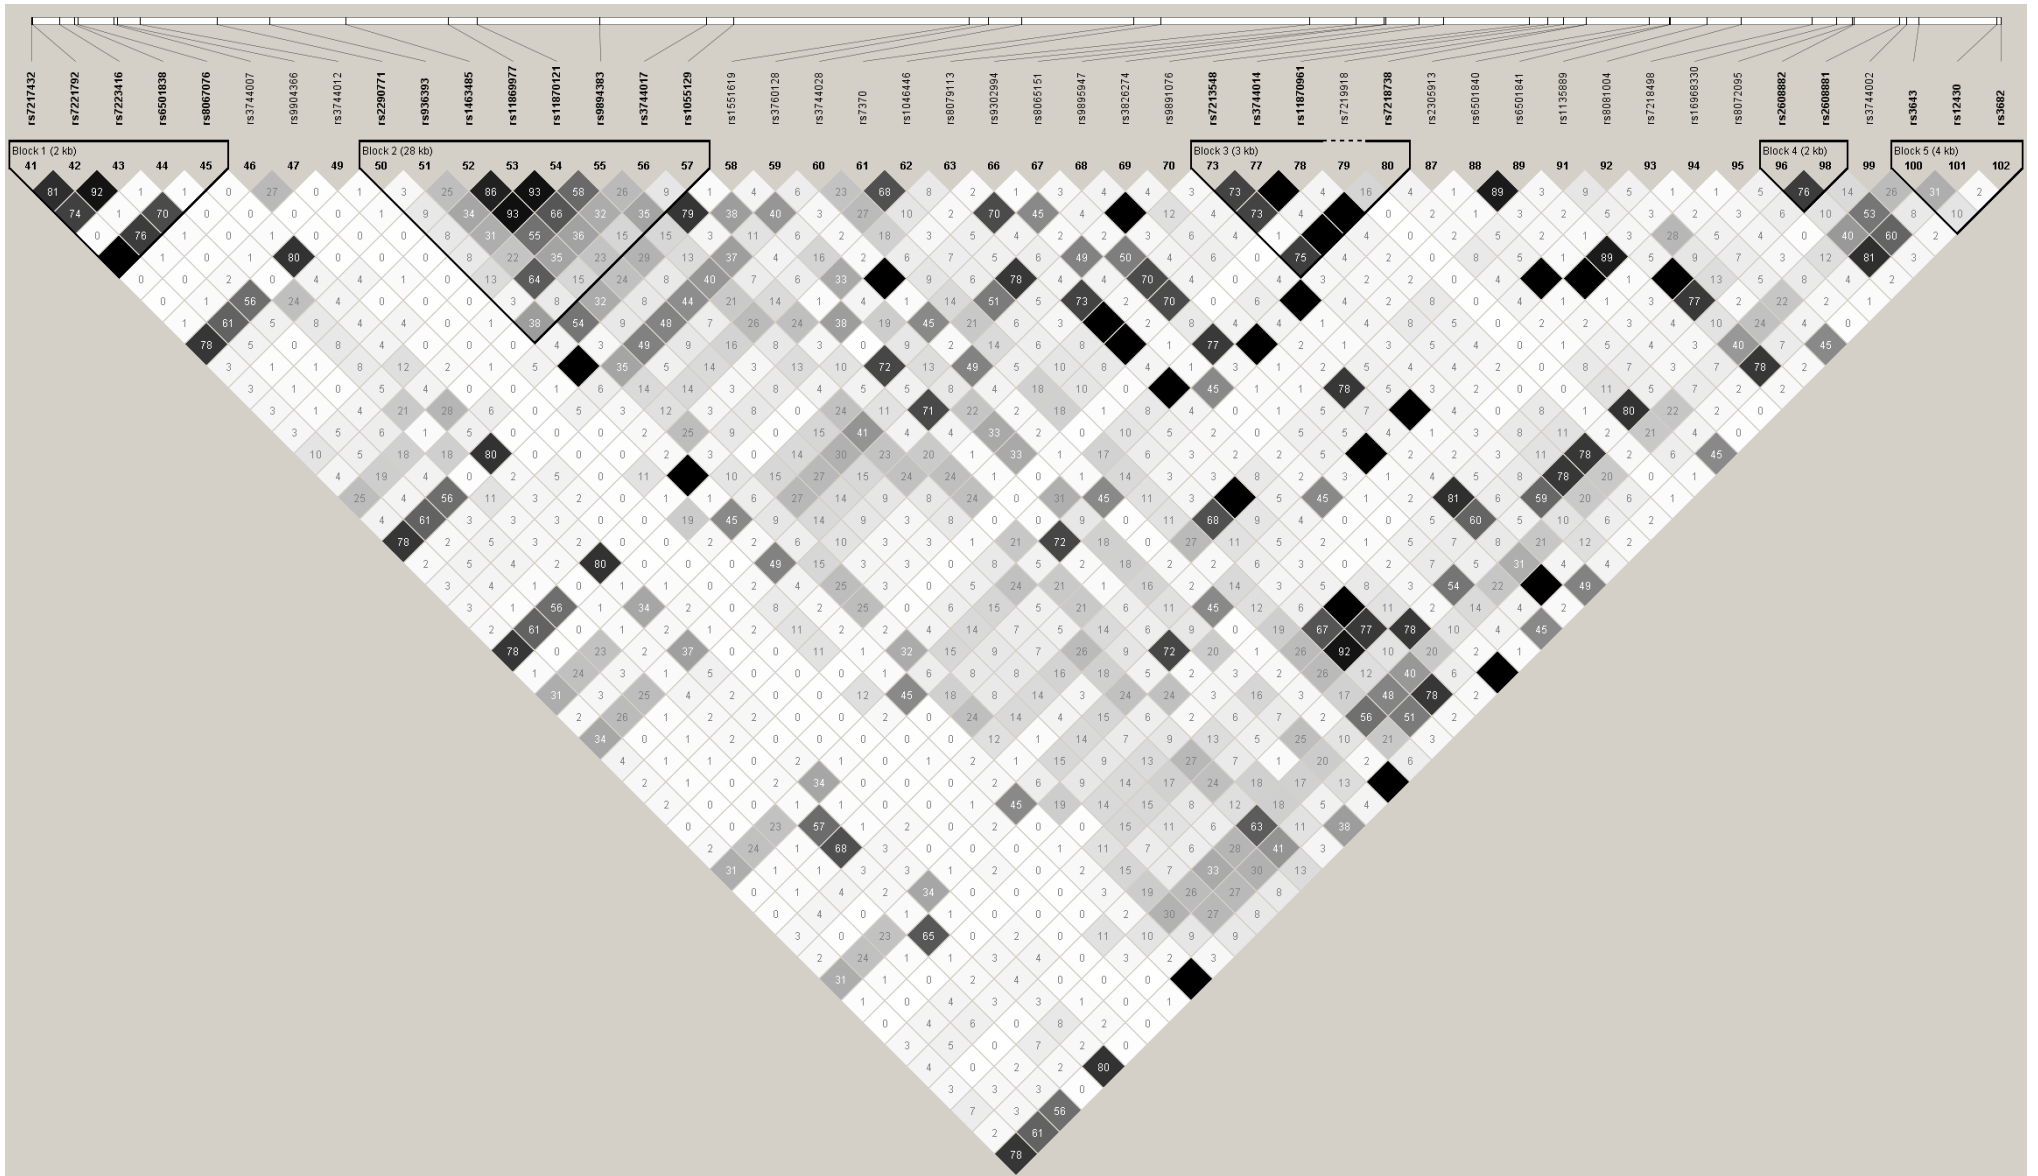

Supplement: NIHMS273638-supplement-Supp_Fig_S3b.pdf [file NIHMS273638-supplement-Supp_Fig_S3b.pdf]
